# Supplementary material
Source: publisher figshare collection journal article supplement (https://gsapubs.figshare.com/ndownloader/files/23314799)
Supplement: Supplementary file 1 [file 23314799]

## Sheet: F02-25
XRF of K-3 samples
F02-25	Kulanaokuaiki Pali, 800 m W of Ainahou Ranch Road
aka F4-64
1/4-3/8 inch sieve size clasts selected around the average s.g. for each slice.
Analysis: Smithsonian Institution
	S.G.	SiO2	Al2O3	Fe2O3	MgO	CaO	Na2O	K2O	TiO2	P2O5	MnO	L.O.I.	SUM
F02-25-1M	1.8-1.89	48.68	12.99	13.49	8.11	10.39	1.98	0.43	2.75	0.26	0.18	0.61	99.87
F02-25-1K	1.7-1.79	48.18	13.63	13.83	7.32	10.24	1.98	0.43	2.87	0.27	0.18	1	99.93
F02-25-1I	1.7-1.79	48.05	13.54	13.73	7.3	10.4	1.94	0.4	3.01	0.26	0.18	1.14	99.95
F02-25-1G	1.8-1.89	48.07	12.95	13.53	9.29	9.95	1.89	0.39	2.61	0.24	0.18	0.73	99.82
F02-25-1G	1.8-1.89	48.07	12.93	13.52	9.53	9.89	1.88	0.39	2.57	0.24	0.18	0.61	99.81
F02-25-1E	1.9-1.99	47.79	12.27	13.06	11.73	9.62	1.77	0.34	2.22	0.2	0.17	0.98	100.15
F02-25-1C	1.9-1.99	47.25	11.87	13.35	13.39	9.16	1.65	0.31	2.12	0.19	0.17	0.58	100.06
F02-25-1A	2.0-2.09	46.65	11.45	13.61	14.49	8.84	1.54	0.29	2.03	0.18	0.17	0.54	99.79
F02-25-1I	coarse ash	48.09	13.44	13.09	8.71	10.54	1.89	0.37	2.63	0.24	0.17	0.92	100.09
4-8mm
Analysis: Smithsonian Institution
	SiO2	Al2O3	Fe2O3	MgO	CaO	Na2O	K2O	TiO2	P2O5	MnO	SUM	LOI
F02-25-1A	46.8406	11.9326	14.0711	14.3154	8.75404	1.34087	0.252423	2.13045	0.185784	0.175687	99.9989	1.01
F02-25-1C	47.9254	12.0302	13.4093	13.0403	9.30444	1.47379	0.292339	2.16129	0.195565	0.171371	100.004	0.5
F02-25-1E	48.4272	12.5837	13.2433	11.3184	9.78621	1.60661	0.322924	2.32689	0.209557	0.175204	100	0.53
F02-25-1G	48.8094	13.1455	13.4303	9.27869	10.25	1.68852	0.362705	2.6291	0.233607	0.17418	100.002	0.86
F02-25-1I	48.8037	13.7681	13.8962	7.4527	10.4232	1.76399	0.390641	3.04781	0.266531	0.183113	99.9959	1.23
F02-25-1K	49.2872	13.4895	13.6107	7.64742	10.4826	1.79725	0.403877	2.85339	0.246365	0.181745	100	0.78
F02-25-1M	49.3426	13.4446	13.1493	7.96926	10.7362	1.82848	0.392395	2.71238	0.250809	0.177994	100.004	0.72
dense juvenile material
Analysis: JAMSTEC
	SiO2	Al2O3	Fe2O3	MgO	CaO	Na2O	K2O	TiO2	P2O5	MnO	Total
F02-25-1A	46.944	11.43	12.832	12.075	9.471	1.815	0.329	2.178	0.22	0.166	97.46
F02-25-1C	47.107	11.45	12.556	12.448	9.536	1.822	0.32	2.22	0.225	0.164	97.848
F02-25-1E	47.804	12.063	12.561	10.212	10.17	1.894	0.354	2.319	0.229	0.165	97.771
F02-25-1G	48.239	12.486	12.574	8.357	10.62	1.997	0.405	2.558	0.25	0.166	97.652
F02-25-1K	48.236	12.848	12.897	7.437	10.475	2.087	0.428	2.774	0.27	0.169	97.621
F02-25-1M	49.003	12.64	13.028	8.089	10.496	2.11	0.445	2.651	0.257	0.17	98.889

## Sheet: F4-69
XRF of K-3 samples
F4-69	located in the Koae fracture system
0.5-1.0mm
Analysis: F&M
	SiO2	Al2O3	Fe2O3	MgO	CaO	Na2O	K2O	TiO2	P2O5	MnO	Total	LOI
Sample	46.12	10.36	14.45	17.42	8.07	1.33	0.27	1.83	0.17	0.19	100.02	0.24
F4-69A	45.54	9.66	14.55	19.35	7.44	1.19	0.25	1.7	0.16	0.19	99.84	0.19
F4-69B	45.18	10.05	14.59	18.49	7.54	1.23	0.27	1.74	0.16	0.2	99.25	0.23
F4-69C	45.29	10.16	14.75	18.48	7.63	1.25	0.26	1.73	0.17	0.2	99.72	0.3
F4-69D	47.66	11.49	12.94	13.72	9.69	1.57	0.32	2.04	0.19	0.19	99.62	0.39
F4-69E	47.68	11.16	13.48	14.42	9.5	1.52	0.31	2.02	0.18	0.18	100.27	0.19
F4-69F	48.15	11.69	12.53	12.67	10.21	1.65	0.32	2.07	0.19	0.18	99.48	0.21
F4-69G
Coarse ash between D and E
1-2mm avg 3 analyses
Analysis: Smithsonian Institution
	SiO2	Al2O3	Fe2O3	FeO	MgO	CaO	Na2O	K2O	TiO2	P2O5	MnO	LOI	Total	Cr	Ni
	48.7633	11.7467	5.09667	7.56	13.7567	9.43333	1.5	0.33	2.07667	0.2	0.18	0.34	100.983	990.667	402
F4-69A	49.02	11.75	4.90667	7.61	13.2967	9.53667	1.57333	0.34	2.11	0.196667	0.18	0.44	100.96	944.333	402.333
F4-69B	49.2	11.8767	4.75333	7.65	12.9467	9.70333	1.64333	0.36	2.14667	0.203333	0.18	0.28	100.943	887.667	386.667
F4-69C	49.87	12.26	4.72667	7.63	11.42	10.13	1.71667	0.39	2.28667	0.213333	0.18	0.24	101.063	708.333	301
F4-69D	50.5533	12.7033	4.85	7.15	9.49667	11.1333	1.76667	0.403333	2.42667	0.23	0.18	0.3	101.193	585.667	175.667
F4-69F	50.6867	12.87	4.68	7.18	9.30667	11.18	1.82	0.41	2.40333	0.22	0.176667	0.3	101.233	557.333	163.667
F4-69G
2-4mm
Analysis: F&M
	SiO2	Al2O3	Fe2O3	MgO	CaO	Na2O	K2O	TiO2	P2O5	MnO	Total	LOI	Ni	Cr
Specimen	48.04	11.65	13.06	13.63	9.33	1.51	0.32	2.07	0.2	0.21	100.02	0.4	367	1062
F4-69B	48.27	12.09	12.94	11.8	9.64	1.66	0.34	2.17	0.21	0.21	99.33	0.43	281	890
F4-69C	48.99	12.34	13.03	11.05	9.92	1.73	0.37	2.34	0.22	0.2	100.19	0.32	270	781
F4-69D	49.71	13.1	13.22	8.06	10.46	1.91	0.45	2.67	0.26	0.2	100.04	0.46	137	455
F4-69E	49.69	12.98	12.95	8.66	10.64	1.89	0.42	2.53	0.24	0.19	100.19	0.37	153	565
F4-69F
4-8mm
Analysis: Smithsonian Institution														Cr
	SiO2	Al2O3	Fe2O3	MgO	CaO	Na2O	K2O	TiO2	P2O5	MnO	SUM	LOI	Ni
Sample	48.4281	11.605	13.1116	13.2525	9.39177	1.44855	0.314993	2.09305	0.17822	0.176148	100	-0.03	457.333	1038.33
F4-69A	48.8487	11.6146	12.914	12.8206	9.48284	1.50796	0.31987	2.12783	0.192717	0.170862	100	-0.07	429.667	945.333
F4-69B	49.0358	11.7881	12.849	12.2198	9.65811	1.57201	0.346169	2.16457	0.193447	0.173084	100	-0.18	424.333	889
F4-69C	49.5162	12.3242	13.0987	10.1398	9.98089	1.65745	0.392236	2.47611	0.23333	0.181032	100	-0.02	299.333	670.333
F4-69D	50.2102	12.9296	12.8009	8.04054	10.6711	1.83818	0.442451	2.65068	0.245359	0.170947	100	-0.06	162.667	394.333
F4-69F	50.2258	12.9027	12.9148	7.87468	10.6427	1.86081	0.447563	2.69344	0.256038	0.181444	100	-0.11	153.333	385
F4-69G
1/4 to 3/8 Scoria (S.G.)
Analysis: Smithsonian Institution
	SiO2	Al2O3	Fe2O3	MgO	CaO	Na2O	K2O	TiO2	P2O5	MnO	LOI	Total	Cr	Ni
F4-69A	48.03	11.36	13.19	14.4	8.81	1.69	0.39	1.91	0.19	0.17	-0.14	100	1067	510
F4-69B	48.215	11.745	12.92	13.255	9.11	1.75	0.395	1.99	0.195	0.17	-0.03	99.715	933	464
F4-69C	48.95	12.2	12.68	11.89	9.49	1.92	0.41	2.08	0.21	0.17	-0.05	99.95	832	382
F4-69D	48.85	12.58	12.91	10.44	9.71	1.9	0.45	2.31	0.22	0.17	0.08	99.63	673	302
F4-69E	49.69	12.58	12.36	9.27	10.98	1.85	0.4	2.36	0.22	0.17	0.26	100.14	619	194
F4-69F	49.98	12.98	13.08	7.92	10.43	2.04	0.49	2.69	0.26	0.18	0.06	100.1	332	139
F4-69G	50.085	12.955	12.83	8.025	10.62	2.01	0.475	2.63	0.255	0.175	0.105	100.165	382	146

## Sheet: F02-1-7
XRF of K-3 samples
F02-1	LIES ABOUT 2+ KM EAST OF THE KIPUKA NENE SHELTER
0.5-1.0 mm
Analysis: F&M
sample	SiO2	Al2O3	Fe2O3	MgO	CaO	Na2O	K2O	TiO2	MnO	P2O5	Total	LOI
F02-1-7A	43.16	9.16	16.16	22.15	6.38	1.04	0.18	1.69	0.2	0.15	100.27	2.47
F02-1-7B	42.53	8.73	16.28	23.14	5.98	1	0.2	1.6	0.22	0.15	99.83	2.06
F02-1-7C	41.95	8.46	16.57	23.98	5.54	0.93	0.16	1.59	0.21	0.15	99.54	3.19
F02-1-7D	46.36	12.31	13.99	13.24	9.84	1.47	0.26	2.29	0.2	0.19	100.15	4.31
F02-1-7E	47.39	12.42	13.54	11.56	10.59	1.61	0.29	2.35	0.19	0.19	100.13	2.52
F02-1-7F	47.27	12.42	13.7	11.62	10.58	1.6	0.28	2.36	0.19	0.2	100.22	2.7
F02-1-7G	47.12	12.85	13.97	12	9.34	1.57	0.3	2.55	0.21	0.2	100.11	4.63
1-2mm
Analysis: Smithsonian Institution
Sample name	SiO2c	Al2O3c	Fe2O3c	MgOc	CaOc	Na2Oc	K2Oc	TiO2	P2O5c	MnOc	L.O.I.	SUM
F02-1-7A	46.71	12.13	13.65	12.53	9.45	1.56	0.28	2.26	0.21	0.18	1.59	100.54
F02-1-7A	46.81	12.22	13.66	12.55	9.47	1.55	0.28	2.25	0.2	0.18	1.59	100.76
F02-1-7A	46.71	12.18	13.64	12.57	9.44	1.56	0.28	2.25	0.22	0.18	1.59	100.62
F02-1-7A avg	46.7433	12.1767	13.65	12.55	9.45333	1.55667	0.28	2.25333	0.21	0.18	1.59	100.643
F02-1-7B	46.76	12.12	13.69	12.54	9.42	1.59	0.29	2.25	0.21	0.18	1.65	100.69
F02-1-7B	46.72	12.16	13.66	12.55	9.41	1.58	0.29	2.24	0.2	0.17	1.65	100.63
F02-1-7B	46.74	12.2	13.67	12.51	9.4	1.55	0.29	2.25	0.2	0.18	1.65	100.64
F02-1-7Bavg	46.74	12.16	13.6733	12.5333	9.41	1.57333	0.29	2.24667	0.203333	0.176667	1.65	100.657
F02-1-7C	46.62	12.08	13.64	12.44	9.43	1.57	0.29	2.23	0.21	0.17	1.55	100.23
F02-1-7C	46.7	12.11	13.62	12.42	9.41	1.58	0.29	2.24	0.2	0.17	1.55	100.28
F02-1-7C	46.82	12.14	13.63	12.53	9.44	1.59	0.29	2.24	0.2	0.17	1.55	100.6
F02-1-7C avg
F02-1-7D	46.56	12.88	14.02	9.5	10.02	1.66	0.32	2.7	0.22	0.18	2.48	100.54
F02-1-7D	46.58	12.92	14.03	9.53	10.03	1.65	0.32	2.7	0.22	0.18	2.48	100.65
F02-1-7D	46.47	12.98	14.03	9.54	10.04	1.64	0.32	2.7	0.23	0.18	2.48	100.61
F02-1-7D avg	46.5367	12.9267	14.0267	9.52333	10.03	1.65	0.32	2.7	0.223333	0.18	2.48	100.597
F02-1-7E	46.94	13.39	14.14	8.76	10.13	1.69	0.34	2.8	0.25	0.18	2.65	101.27
F02-1-7E	47.06	13.39	14.13	8.75	10.1	1.71	0.34	2.8	0.24	0.18	2.65	101.35
F02-1-7E	46.67	13.44	14.12	8.81	10.13	1.7	0.34	2.81	0.24	0.18	2.65	101.08
F02-1-7E avg	46.89	13.4067	14.13	8.77333	10.12	1.7	0.34	2.80333	0.243333	0.18	2.65	101.237
F02-1-7F	47.32	13.43	13.8	8.79	10.41	1.71	0.33	2.71	0.22	0.18	2.35	101.26
F02-1-7F	47.25	13.38	13.81	8.8	10.38	1.7	0.34	2.71	0.23	0.18	2.35	101.14
F02-1-7F	47.42	13.34	13.82	8.85	10.39	1.73	0.33	2.7	0.24	0.18	2.35	101.36
F02-1-7F avg	47.33	13.3833	13.81	8.81333	10.3933	1.71333	0.333333	2.70667	0.23	0.18	2.35	101.243
F02-1-7G	47.45	12.41	13.08	10.3	11	1.56	0.26	2.4	0.19	0.17	2.36	101.18
F02-1-7G	47.22	12.48	13.07	10.28	10.97	1.53	0.26	2.41	0.2	0.17	2.36	100.95
F02-1-7G	47.23	12.44	13.07	10.3	10.97	1.53	0.26	2.41	0.19	0.17	2.36	100.93
F02-1-7G avg	47.3	12.4433	13.0733	10.2933	10.98	1.54	0.26	2.40667	0.193333	0.17	2.36	101.02
4-8 mm
Analysis: Smithsonian Institution
sample	SiO2	Al2O3	Fe2O3	MgO	CaO	Na2O	K2O	TiO2	P2O5	MnO	SUM	LOI
F02-1-7A	47.2341	12.5229	13.8376	12.7288	9.25156	1.46753	0.267009	2.31136	0.205862	0.17325	100	1.74
F02-1-7B	47.5255	12.8557	13.712	11.8331	9.54252	1.49862	0.280601	2.36744	0.207853	0.176675	100	1.74
F02-1-7C	47.8145	13.3077	13.8789	10.2529	9.83277	1.59568	0.310443	2.59738	0.233867	0.175918	100	1.98
F02-1-7D	47.7531	13.9344	14.6457	8.1843	9.93922	1.6835	0.348361	3.0682	0.259449	0.183655	100	2.85
F02-1-7E	48.1061	13.9581	14.119	8.13376	10.3087	1.66789	0.346204	2.93459	0.242343	0.183284	100	2.37
F02-1-7F	48.3331	13.8267	13.9577	8.404	10.1928	1.67395	0.342445	2.84431	0.24374	0.181294	100	2.2
F02-1-7G	46.9964	14.1517	14.7696	9.63291	9.36807	1.50489	0.279215	2.88043	0.24226	0.174509	100	3.84
1/4-3/8 inch sieve size clasts selected around the average s.g. for each slice except E which is coarse ash.
Analysis: Smithsonian Institution
sample	SiO2	Al2O3	Fe2O3	MgO	CaO	Na2O	K2O	TiO2	P2O5	MnO	L.O.I.	SUM
F02-1-7A	46.17	12.48	13.37	12.28	9.04	1.66	0.32	2.17	0.21	0.17	1.57	99.46
F02-1-7B	46.8	12.64	13.25	11.71	9.27	1.72	0.35	2.2	0.21	0.18	1.24	99.58
F02-1-7C	46.96	12.76	13.2	11.58	9.24	1.75	0.35	2.21	0.21	0.17	1.18	99.61
F02-1-7D	46.59	2.69	13.69	8.81	9.28	1.75	0.38	1.75	0.24	0.18	2.08	99.53
F02-1-7E	46.56	13.23	13.49	9.3	10.15	1.71	0.32	2.61	0.22	0.17	2.05	99.8
F02-1-7F	46.37	13.72	14	7.55	10.02	1.82	0.36	2.95	0.28	0.18	2.4	99.65
F02-1-7G	43.37	14.42	14.93	8.47	8.83	1.42	0.23	2.96	0.23	0.17	4.54	99.56

## Sheet: Bomb rinds
Bomb rind XRF whole rock analyses.
SAMPLE	S4-27-7	27-3	80-7	80-6	66-2	14-5	8-7
type	bomb rind	bomb rind	bomb rind	bomb rind	bomb rind	bomb rind	bomb rind
SiO2	50.23	51.01	50.86	50.6	50.53	50.58	49.89
TiO2	2.3	2.87	2.53	2.68	2.78	2.91	2.58
Al2O3	13	13.2	13.08	13.02	12.96	13.12	12.87
Fe2O3	1.13	2.42	1.43	1.8	2.23	2.14	1.93
FeO	10.08	9.95	10.08	10.03	9.87	10.27	10.01
MnO	0.17	0.18	0.17	0.18	0.18	0.18	0.18
MgO	9.73	7.2	8.27	7.66	7.35	7.17	8.6
CaO	10.3	10.33	10.69	10.46	10.29	10.27	10.42
Na2O	2.19	2.34	2.29	2.34	2.33	2.36	2.24
K2O	0.42	0.55	0.48	0.51	0.54	0.54	0.47
P2O5	0.23	0.28	0.25	0.26	0.27	0.29	0.25
L.O.I.	0.5	0.24	0.33	0.38	0.46	0.29	0.18
SUM	100.27	100.57	100.46	99.9	99.81	100.12	99.61

## Sheet: BHVO
BHVO/BHVO-2 analyses whole rock analyses from the three laboratories
Fe2O3T is total iron reported as Fe2O3
BHVO certificate
	SiO2	TiO2	Al2O3	Fe2O3	FeO	MgO	CaO	Na2O	K2O	P2O5	MnO	LOI
	49.94	2.71	13.8	2.82	8.58	7.23	11.4	2.26	0.52	0.27	0.17	-0.52	99.95
Smithsonian
BHVO	49.55	2.74	14.02	2.47	8.65	7.31	11.34	2.22	0.51	0.26	0.17	-0.52	98.72	SI Feb 1997
	49.75	2.75	14.01	2.5	8.65	7.31	11.33	2.26	0.51	0.26	0.17	-0.52	98.98	SI Feb 1997
	49.7	2.74	14.02	2.51	8.65	7.32	11.35	2.23	0.51	0.28	0.17	-0.52	98.96	SI Feb 1997
	49.82	2.8	13.71	2.89	8.65	7.29	11.6	2.29	0.52	0.28	0.17	-0.52	99.49	2007-02-01
	49.78	2.8	13.63	2.89	8.65	7.28	11.59	2.25	0.52	0.27	0.17	-0.52	99.3	2007-02-01
	50.03	2.8	13.71	2.88	8.65	7.3	11.58	2.27	0.52	0.28	0.17	-0.52	99.66	2007-02-01
BHVO-2 certificate
	49.9	2.73	13.5	12.3	7.23	11.4	2.22	0.52	0.27	0.13
Jamstec
	SiO2	TiO2	Al2O3	Fe2O3T	MgO	CaO	Na2O	K2O	P2O5	MnO
BHVO-2	49.6935	2.74344	13.4459	12.2902	7.2656	11.5064	2.15054	0.512511	0.221083	0.170837	99.8292
Franklin and Marshall
	SiO2	TiO2	Al2O3	Fe2O3T	MnO	MgO	CaO	Na2O	K2O	P2O5	Total
BHVO-2	49.94	2.72	13.63	12.43	0.165	7.299	11.473	2.196	0.505	0.265	100.623
BHVO-2	50.02	2.73	13.66	12.45	0.165	7.292	11.482	2.19	0.507	0.267	100.763
BHVO-2	49.97	2.73	13.66	12.41	0.165	7.285	11.485	2.197	0.507	0.267	100.676
BHVO-2	49.94	2.72	13.65	12.42	0.165	7.294	11.49	2.2	0.505	0.266	100.65
BHVO-2	49.83	2.72	13.61	12.4	0.165	7.291	11.473	2.202	0.504	0.267	100.462
BHVO-2	49.95	2.73	13.62	12.43	0.165	7.309	11.505	2.191	0.504	0.266	100.67
BHVO-2	50	2.73	13.65	12.42	0.164	7.304	11.491	2.19	0.505	0.266	100.72
BHVO-2	49.92	2.73	13.62	12.42	0.166	7.29	11.486	2.199	0.507	0.268	100.606
BHVO-2	49.97	2.73	13.64	12.43	0.165	7.289	11.488	2.192	0.508	0.268	100.68
BHVO-2	49.95	2.72	13.66	12.43	0.165	7.29	11.479	2.197	0.507	0.266	100.664
	SI	F&M	SI	F&M
	F01-27-2	F01-27-2	F01-30-1	F01-30-1
SiO2	49.57	49.73	50.64	50.3
TiO2	2.93	2.85	2.91	3.26
Al2O3	14.58	14.79	13.52	13.32
Fe2O3	12	11.81	13.78	14.16
MnO	0.17	0.16	0.18	0.19
MgO	6.3	6.61	5.88	5.7
CaO	11.35	11.5	10.43	10.06
Na2O	2.37	2.34	2.39	2.42
K2O	0.41	0.39	0.56	0.62
P2O5	0.19	0.2	0.28	0.32
SUM	99.58	100.38	100.57	100.35
L.O.I.	-0.29	-0.29	-0.49	-0.49
